# Supplementary material for: Comprehensive genomic profiling of high‐grade serous ovarian carcinoma from Chinese patients identifies co‐occurring mutations in the Ras/Raf pathway with TP53
Source: PubMed Central journal article supplement (PMC6639185; doi:10.1002/cam4.2243), 2019-05-24

# All 19 co-occurring mutations of p53 and RAS/RAF (Sanger validated / ddPCR validated / not validated)

| Individual ID | TP53<br>mutation | VAF<br>(TP53) | KRAS<br>mutation | VAF<br>(KRAS) | NRAS<br>mutation | VAF<br>(NRAS) | BRAF<br>mutation | VAF<br>(BRAF) |
|---------------|------------------|---------------|------------------|---------------|------------------|---------------|------------------|---------------|
| Pt9           | c.782+1G>A       | 0.44          | p.G12V           | 0.50          |                  |               |                  |               |
| Pt13          | p.R248W          | 0.06          | p.G12D           | 0.01          |                  |               |                  |               |
|               | p.Y205C          | 0.01          |                  |               |                  |               |                  |               |
| Pt14          | p.M243_G244del   | 0.43          | p.A59G           | 0.17          |                  |               |                  |               |
| Pt43          | P.N239*          | 0.26          | p.G12V           | 0.42          |                  |               |                  |               |
| Pt69          | p.C277F          | 0.57          | p.G12A           | 0.34          |                  |               |                  |               |
| Pt30          | p.P64Afs*85      | 0.41          |                  |               | p.Q61R           | 0.42          |                  |               |
| Pt51          | p.R342*          | 0.15          |                  |               | p.G12C           | 0.12          |                  |               |
| Pt59          | p.R273H          | 0.87          |                  |               | p.Q61K           | 0.41          |                  |               |
| Pt36          | c.920-2A>G       | 0.67          |                  |               |                  |               | p.D594N          | 0.37          |

Pt9

*TP53* NM\_000546 c.782+1G>A

G A A G A C T C 70 C A G G T C A G G A 80 G C C A

↓ *TP53* c.782+1G>A  
NGS VAF = 0.24

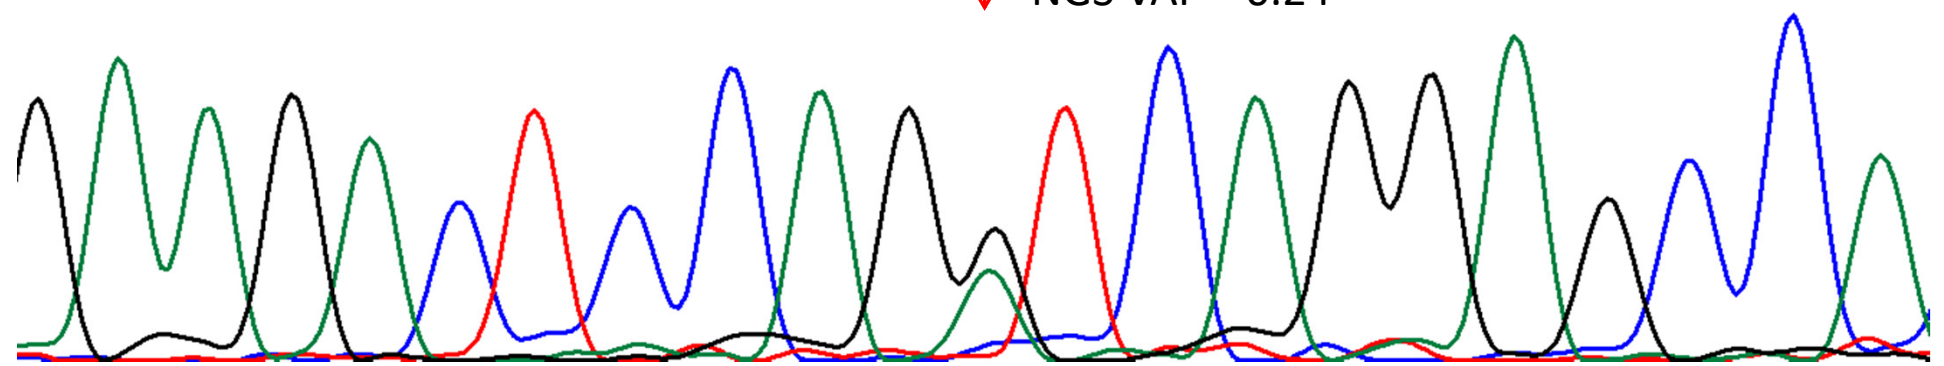

Pt9

*KRAS* NM\_004985 c.35G>T p.G12V

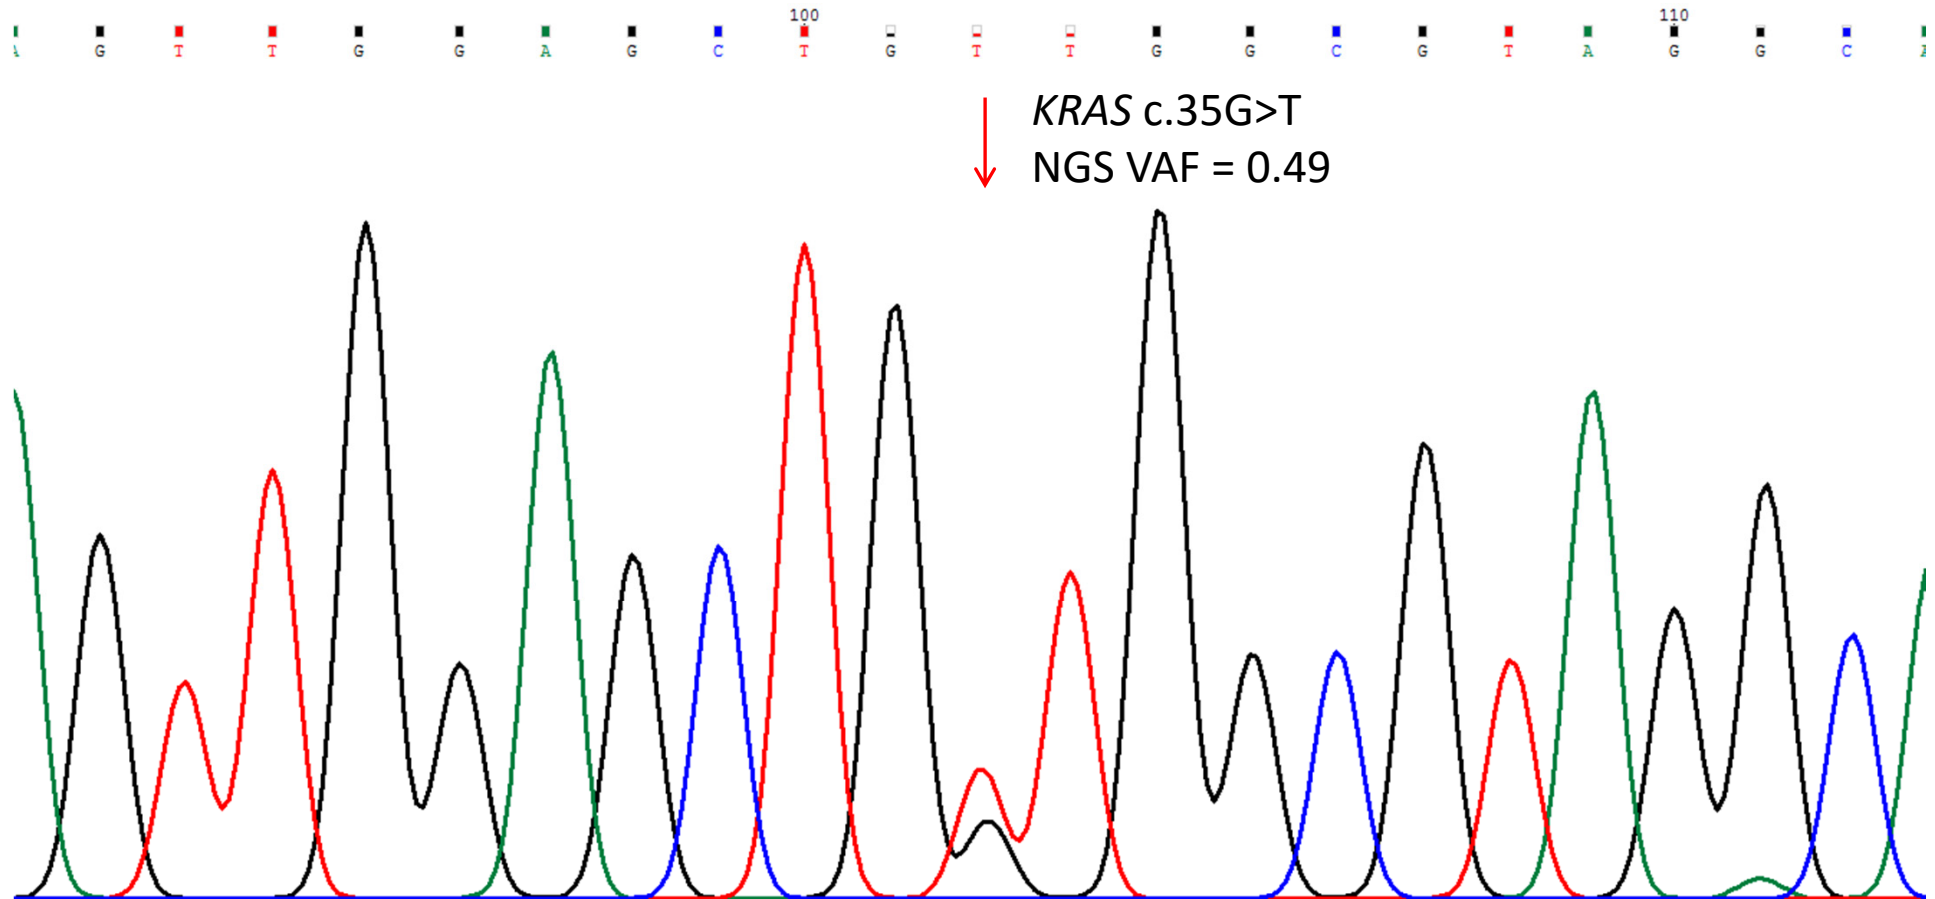

Pt13

TP53 NM\_000546 c.742C>T p.R248W

NGS VAF = 0.06

Sanger failed. Validated by ddPCR (VAF = 0.0693)

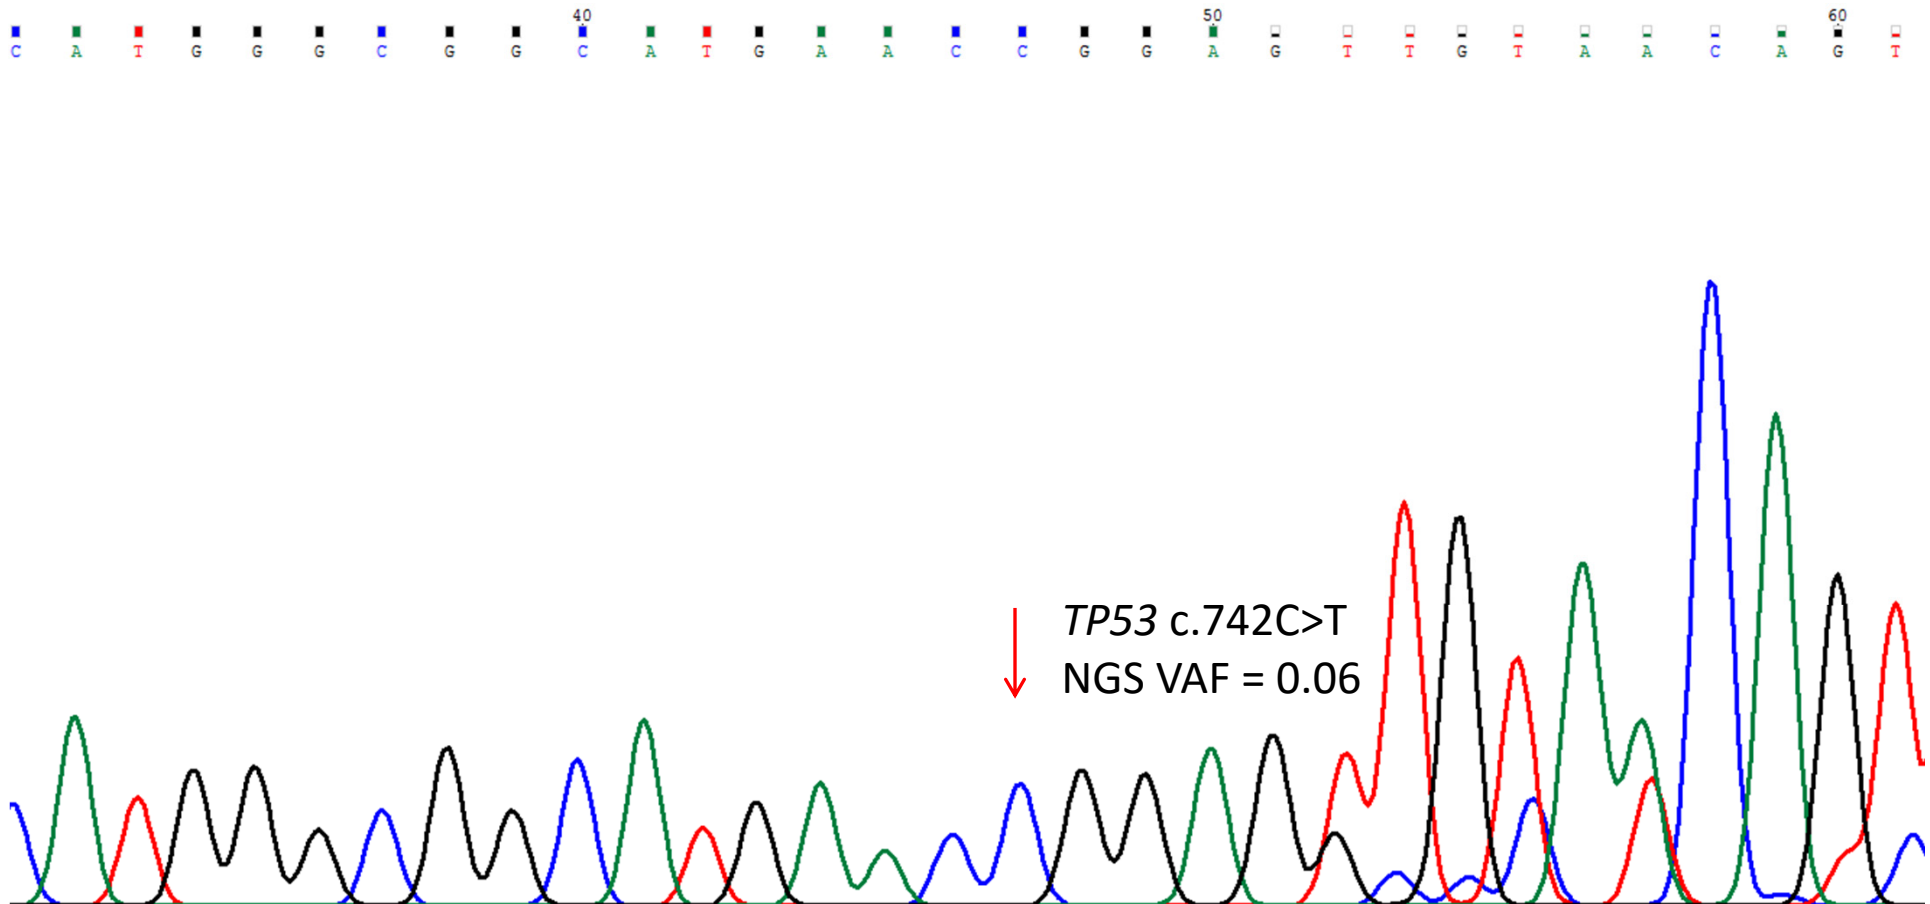

Pt13

*TP53* NM\_000546 c.614A>G p.Y205C

NGS VAF = 0.01

**Sanger failed.** No ddPCR primer available.

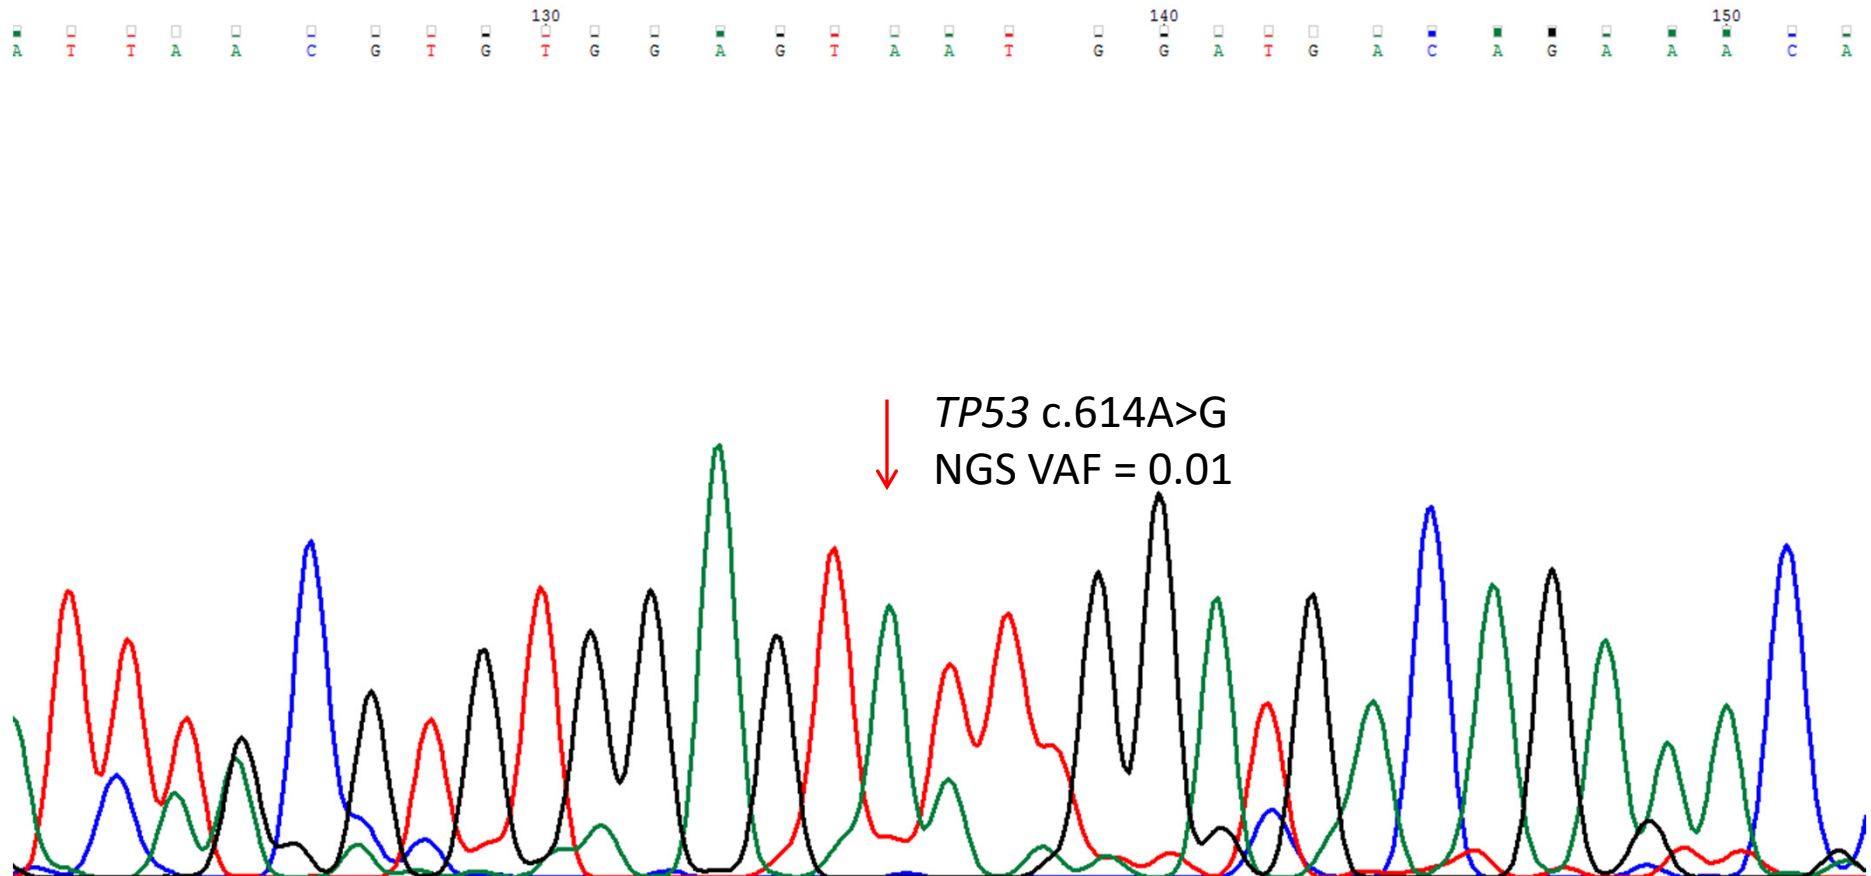

Pt13

*KRAS* NM\_004985 c.35G>A p.G12D

NGS VAF = 0.01

Sanger failed. Validated by ddPCR (VAF = 0.0067)

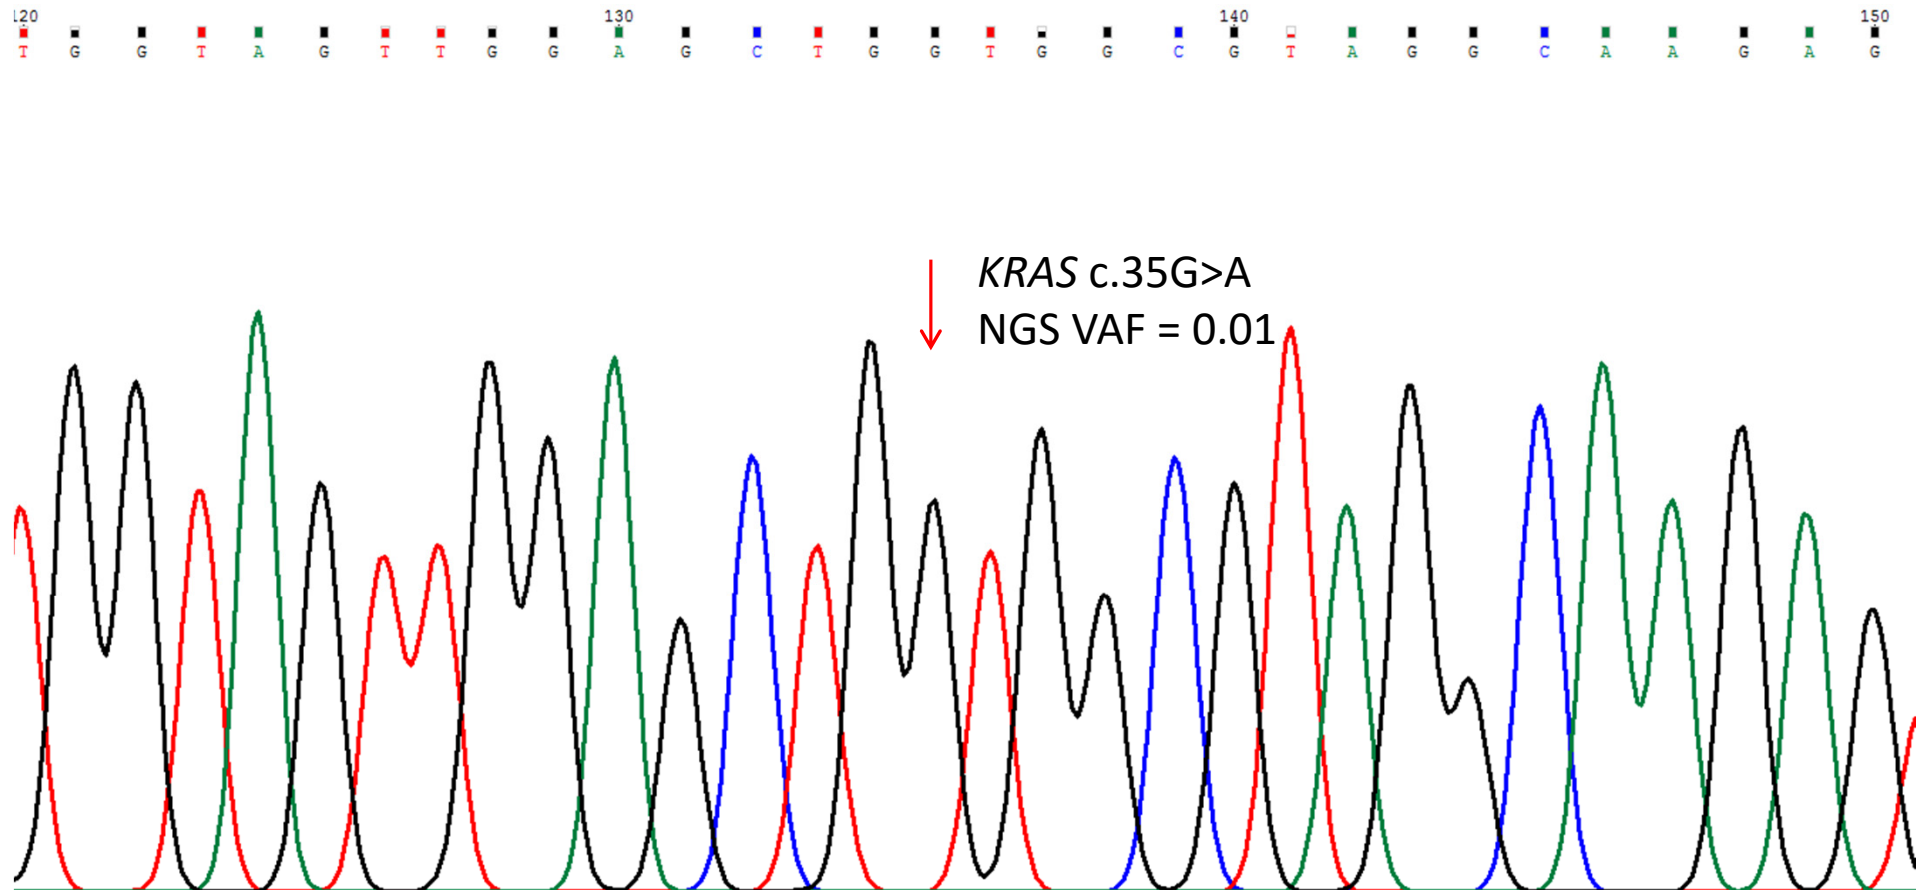

Pt14

*TP53* NM\_000546 c.727\_732del p.M243\_G244del

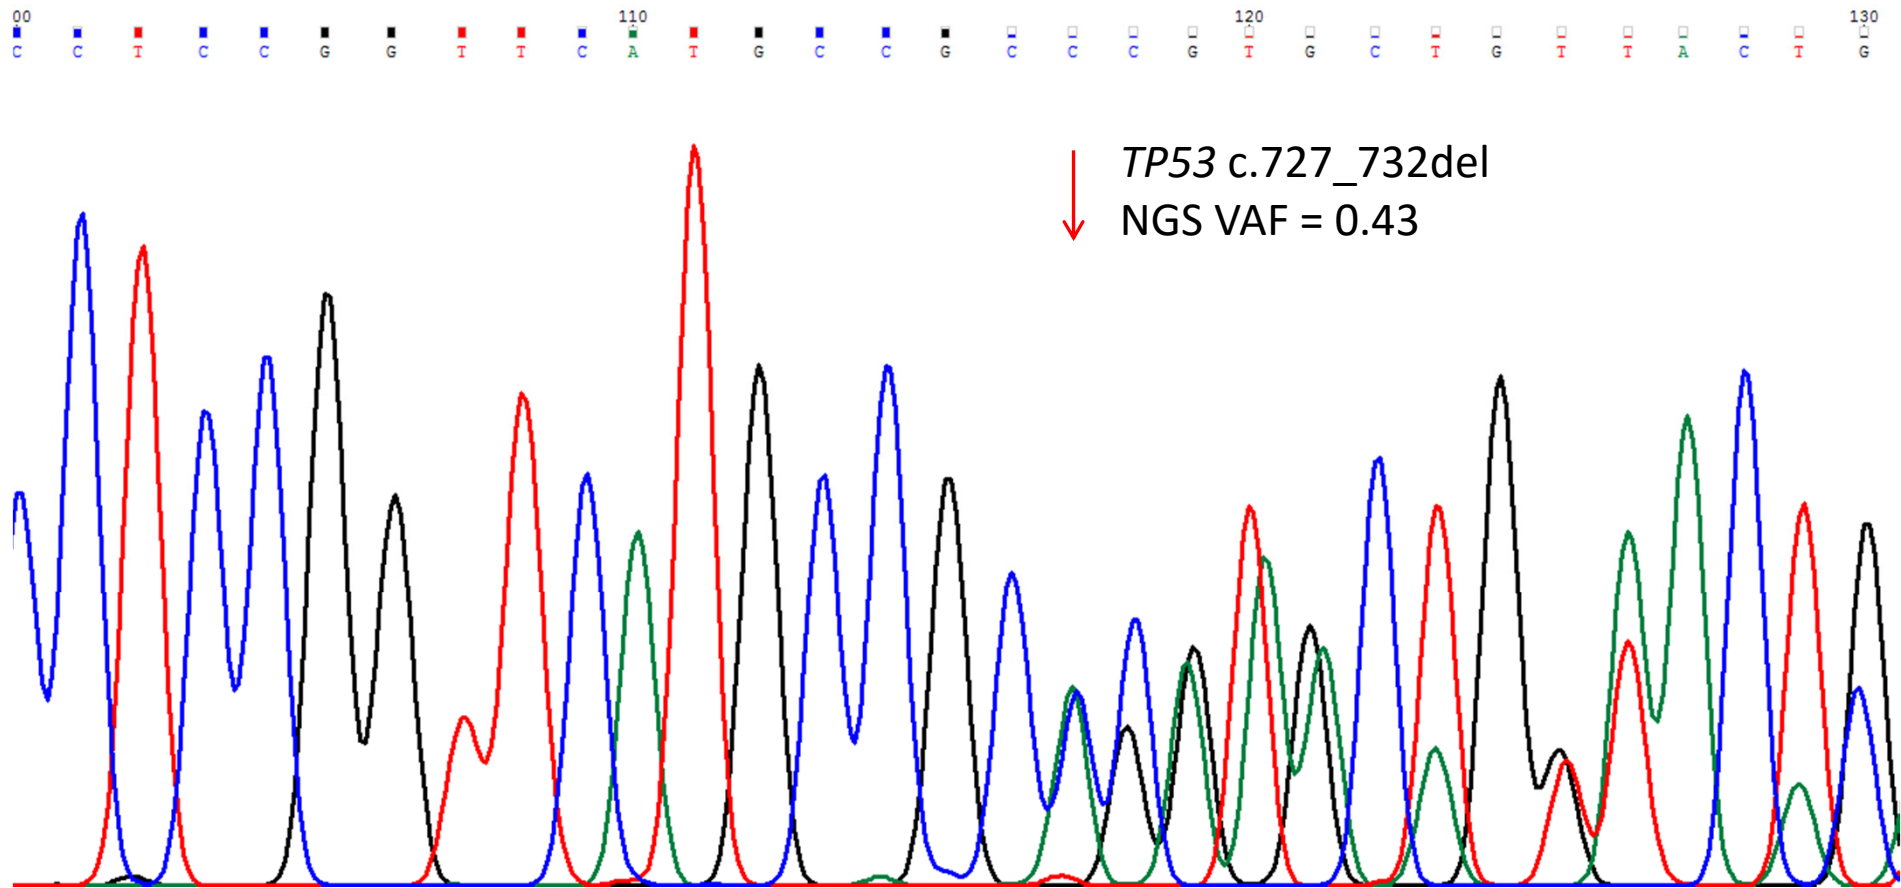

Pt14

*KRAS* NM\_004985 c.176C>G p.A59G

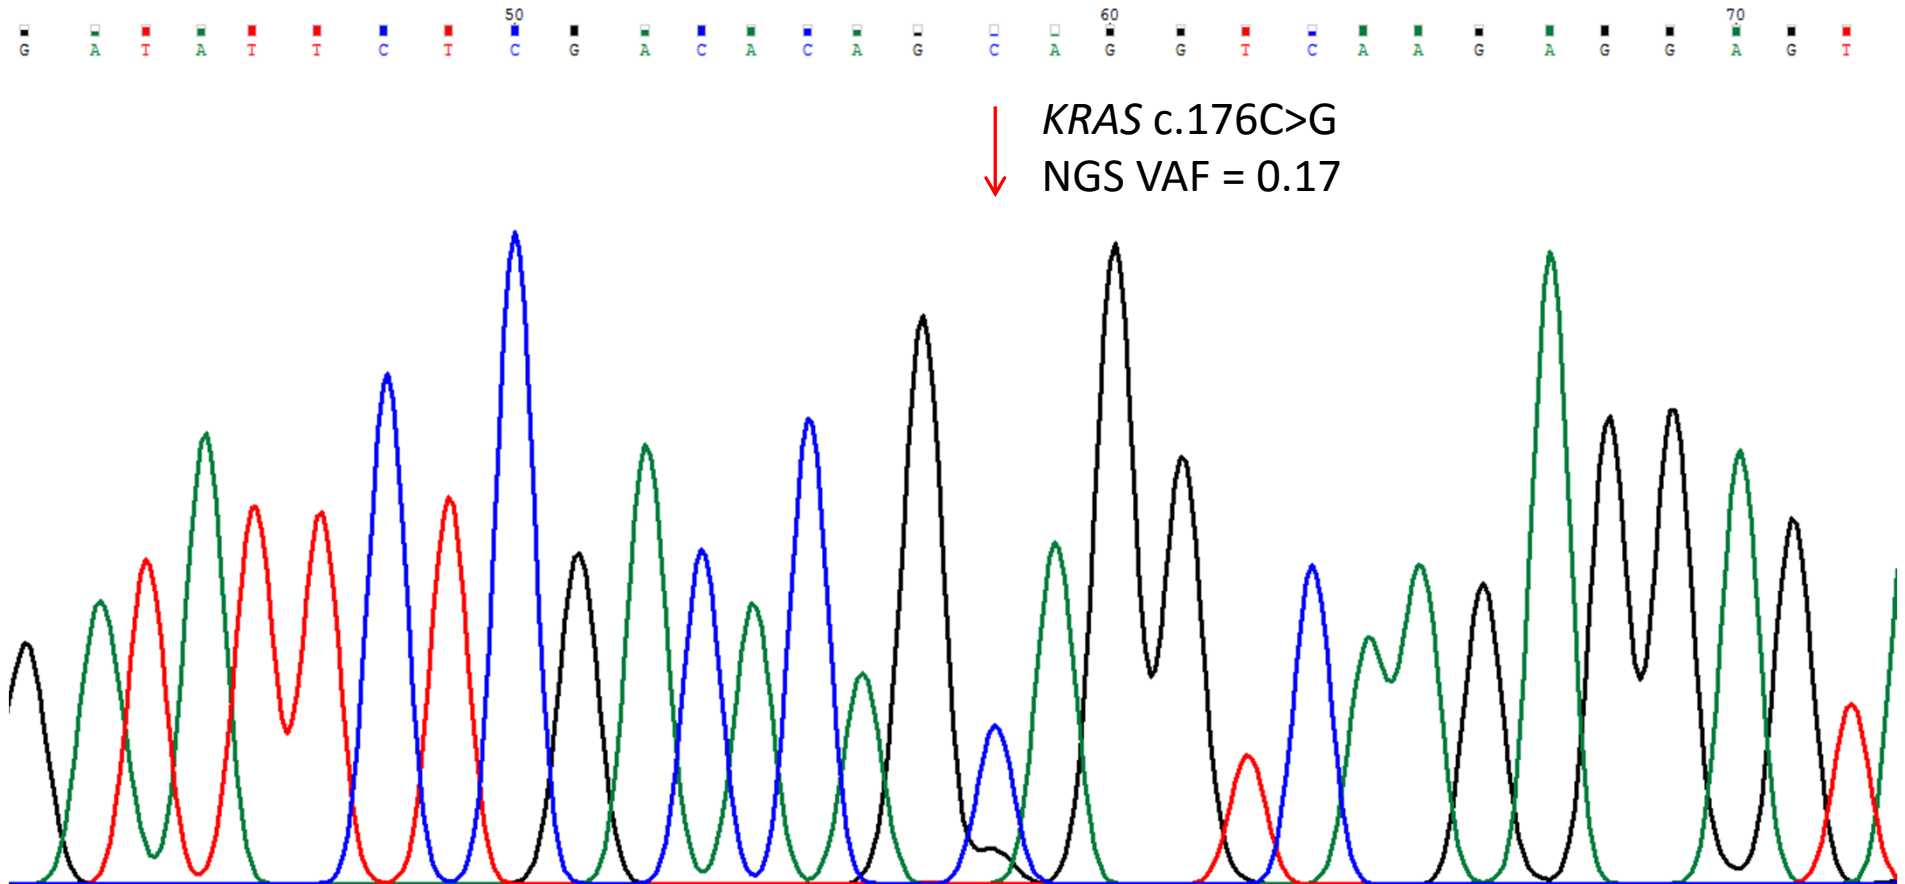



Pt43

*TP53* NM\_000546 c.714dup P.N239\*

C A T G C A G G A A C T G T T A C A C A T G T A G T T G G A G

130

140

150

↓ *TP53* c.714dup  
NGS VAF = 0.26

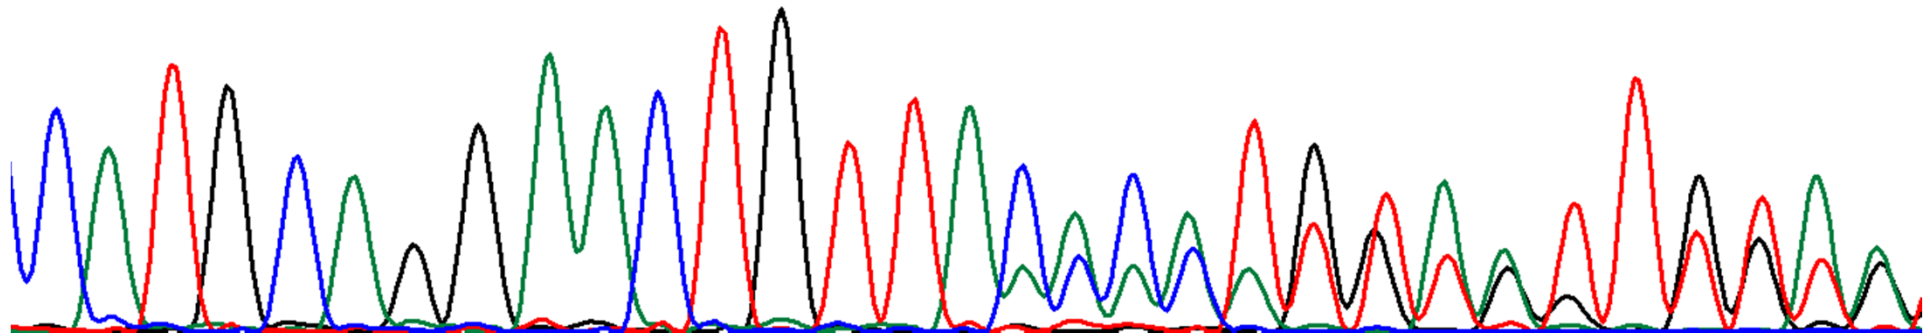

Pt43

*KRAS* NM\_004985 c.35G>T p.G12V

G T G G T A G T T G G A G C T G G C G T A G G C A A G A

↓ *KRAS* c.35G>T  
NGS VAF = 0.42

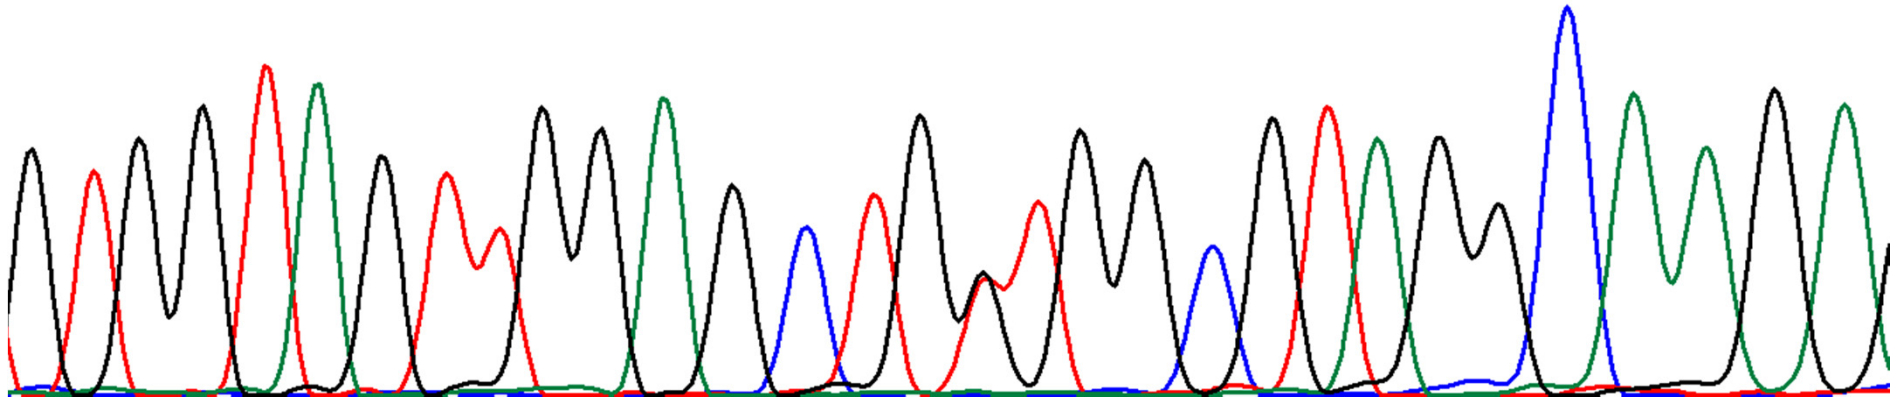

Pt69

*TP53* NM\_000546 c.830G>T p.C277F

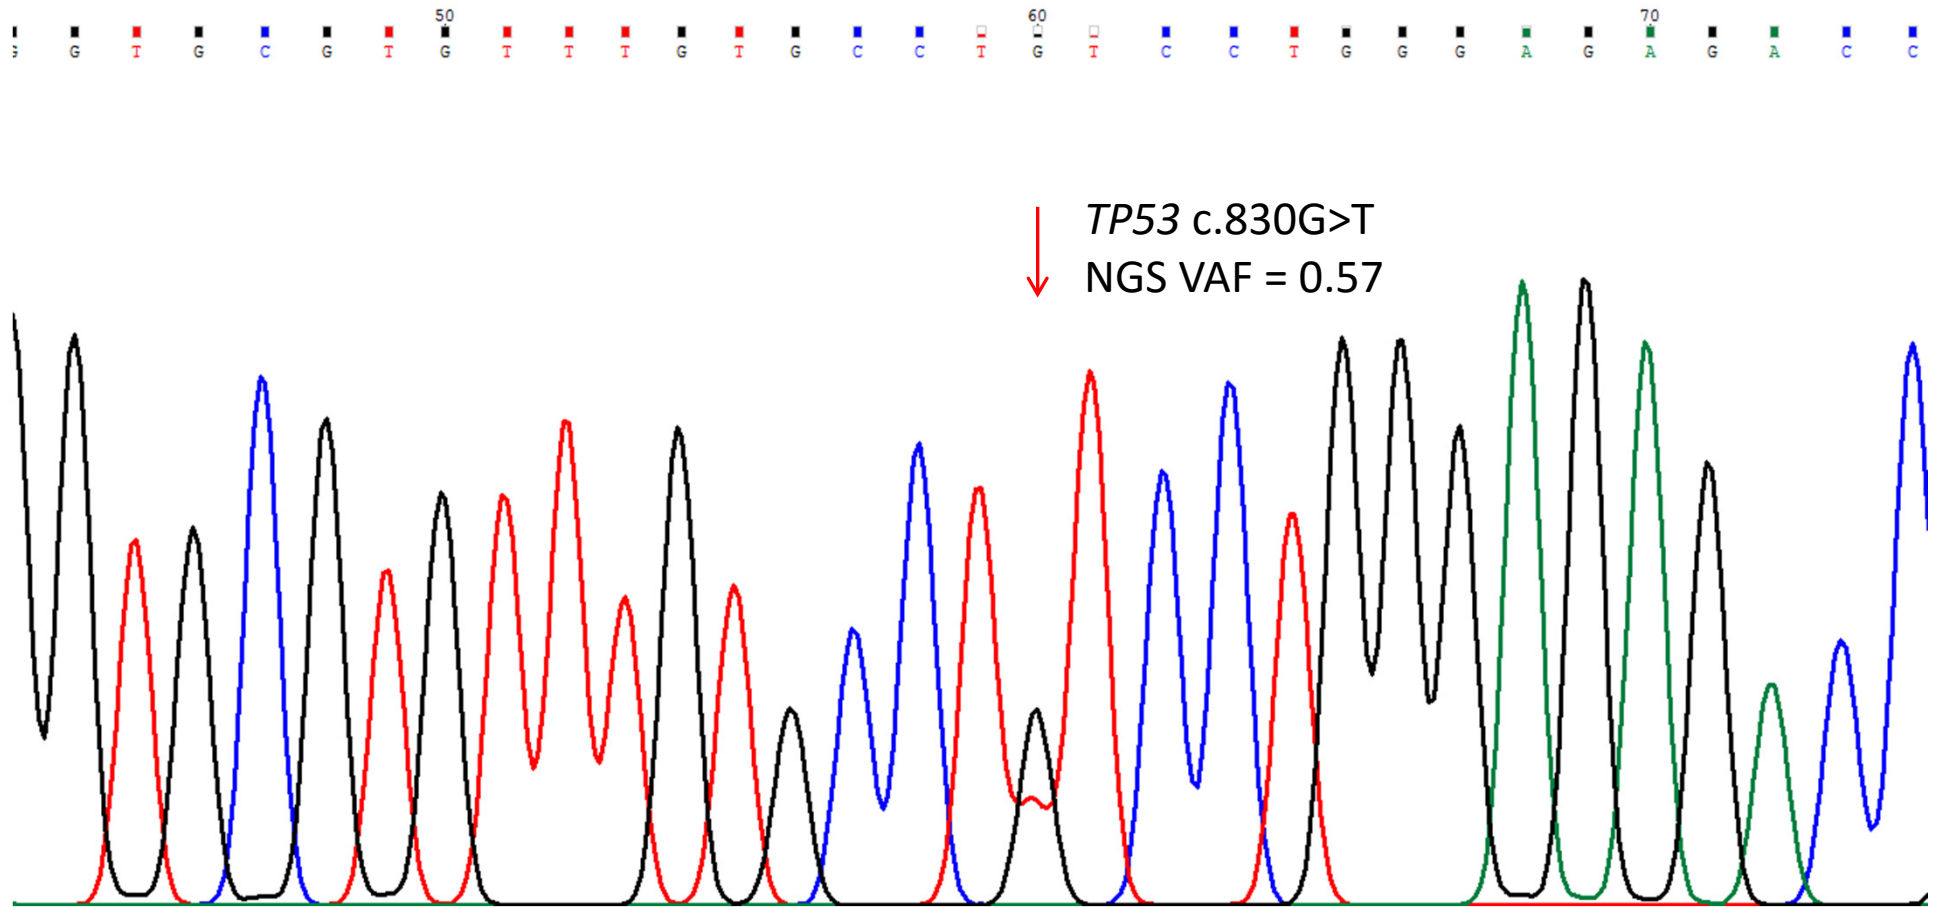

Pt69

*KRAS* NM\_004985 c.35G>C p.G12A

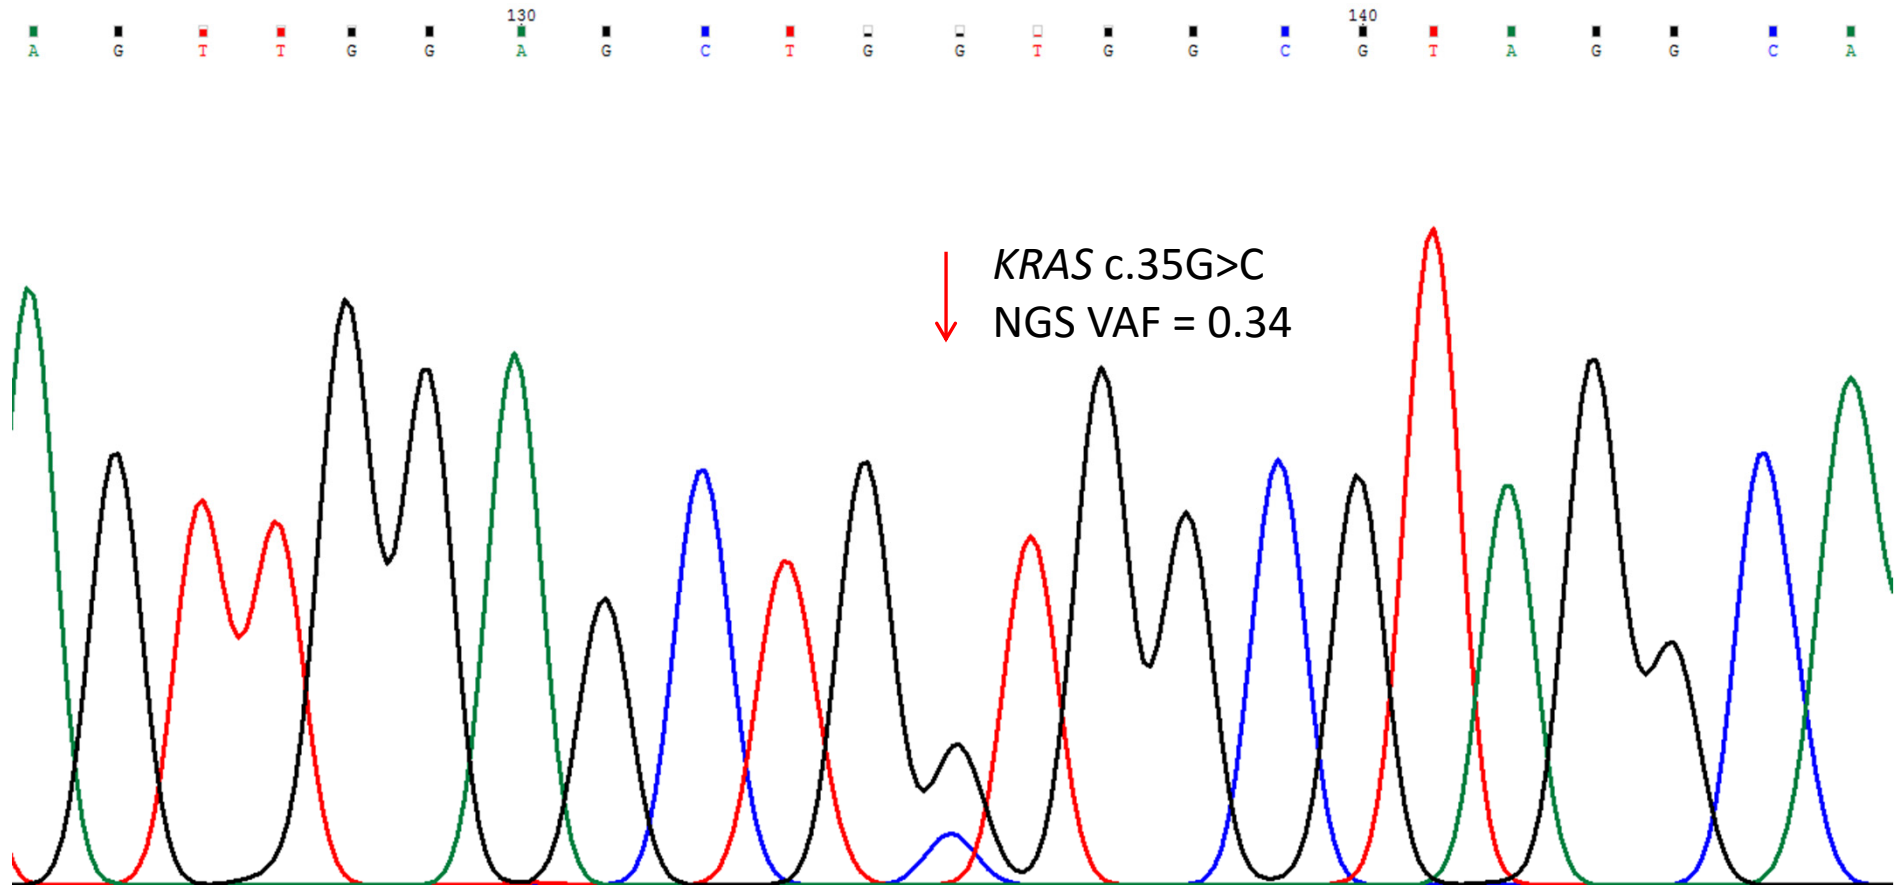

Pt30

*NRAS* NM\_002524 c.182A>G p.Q61R

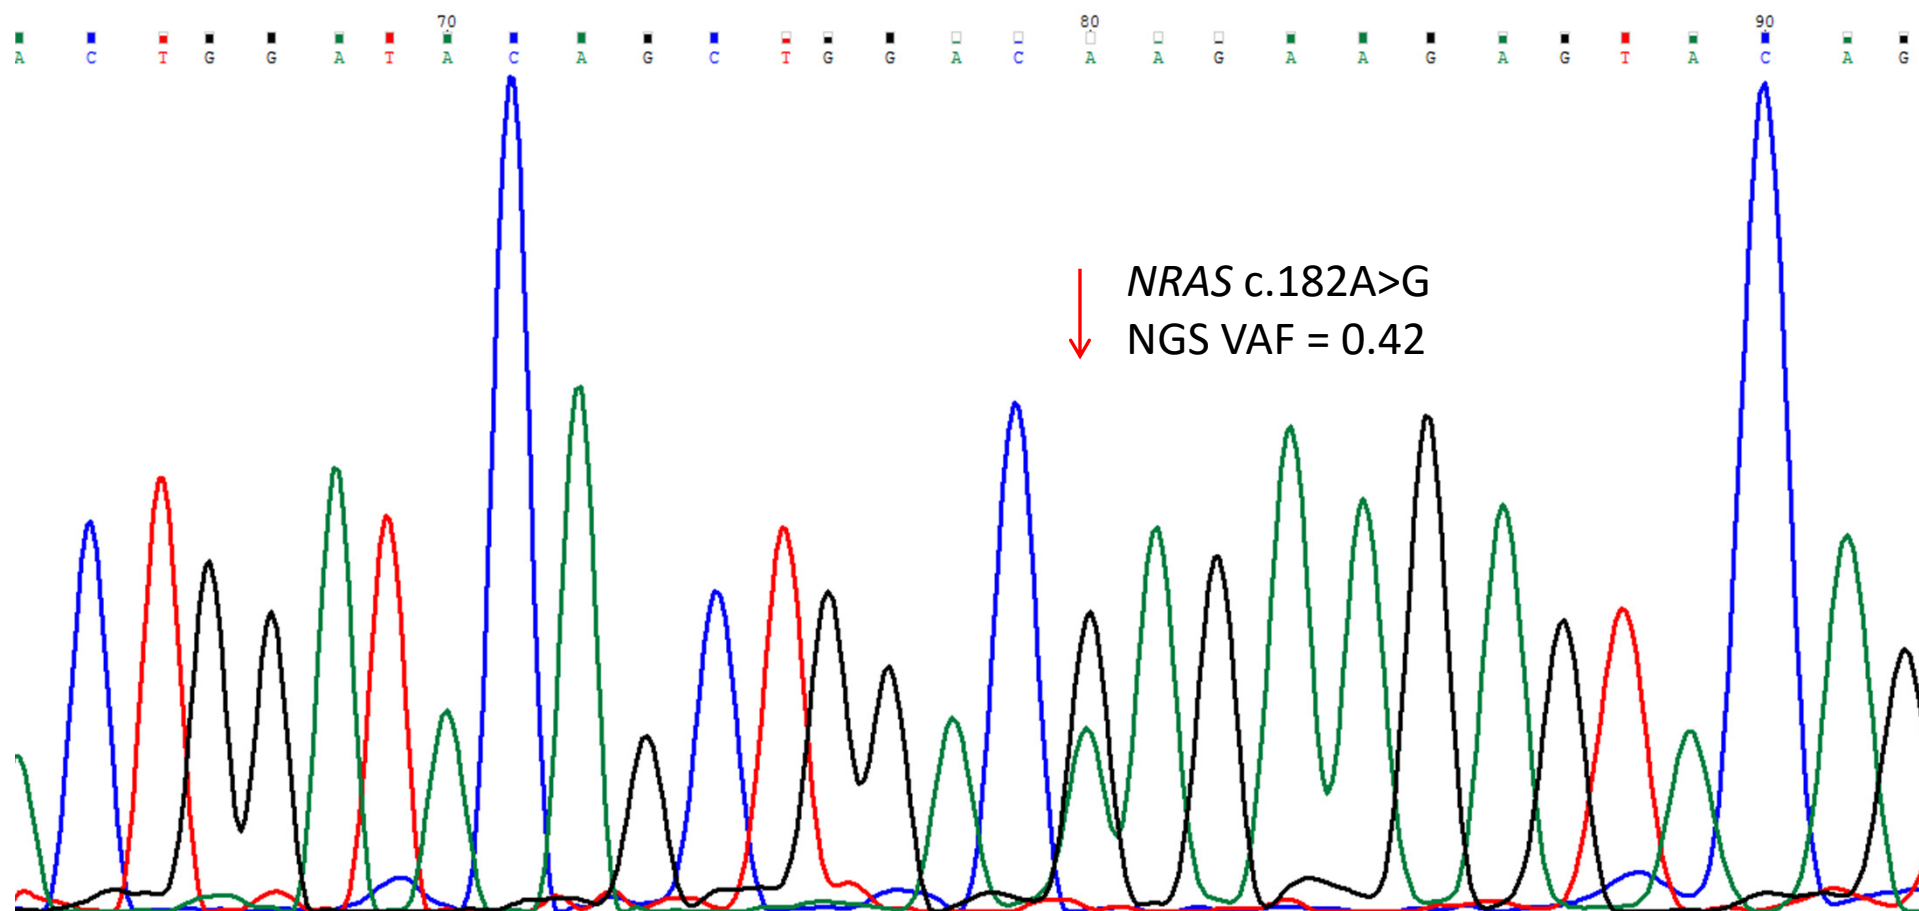

# Pt30

*TP53* NM\_000546 c.189\_190insG p.P64Afs\*85

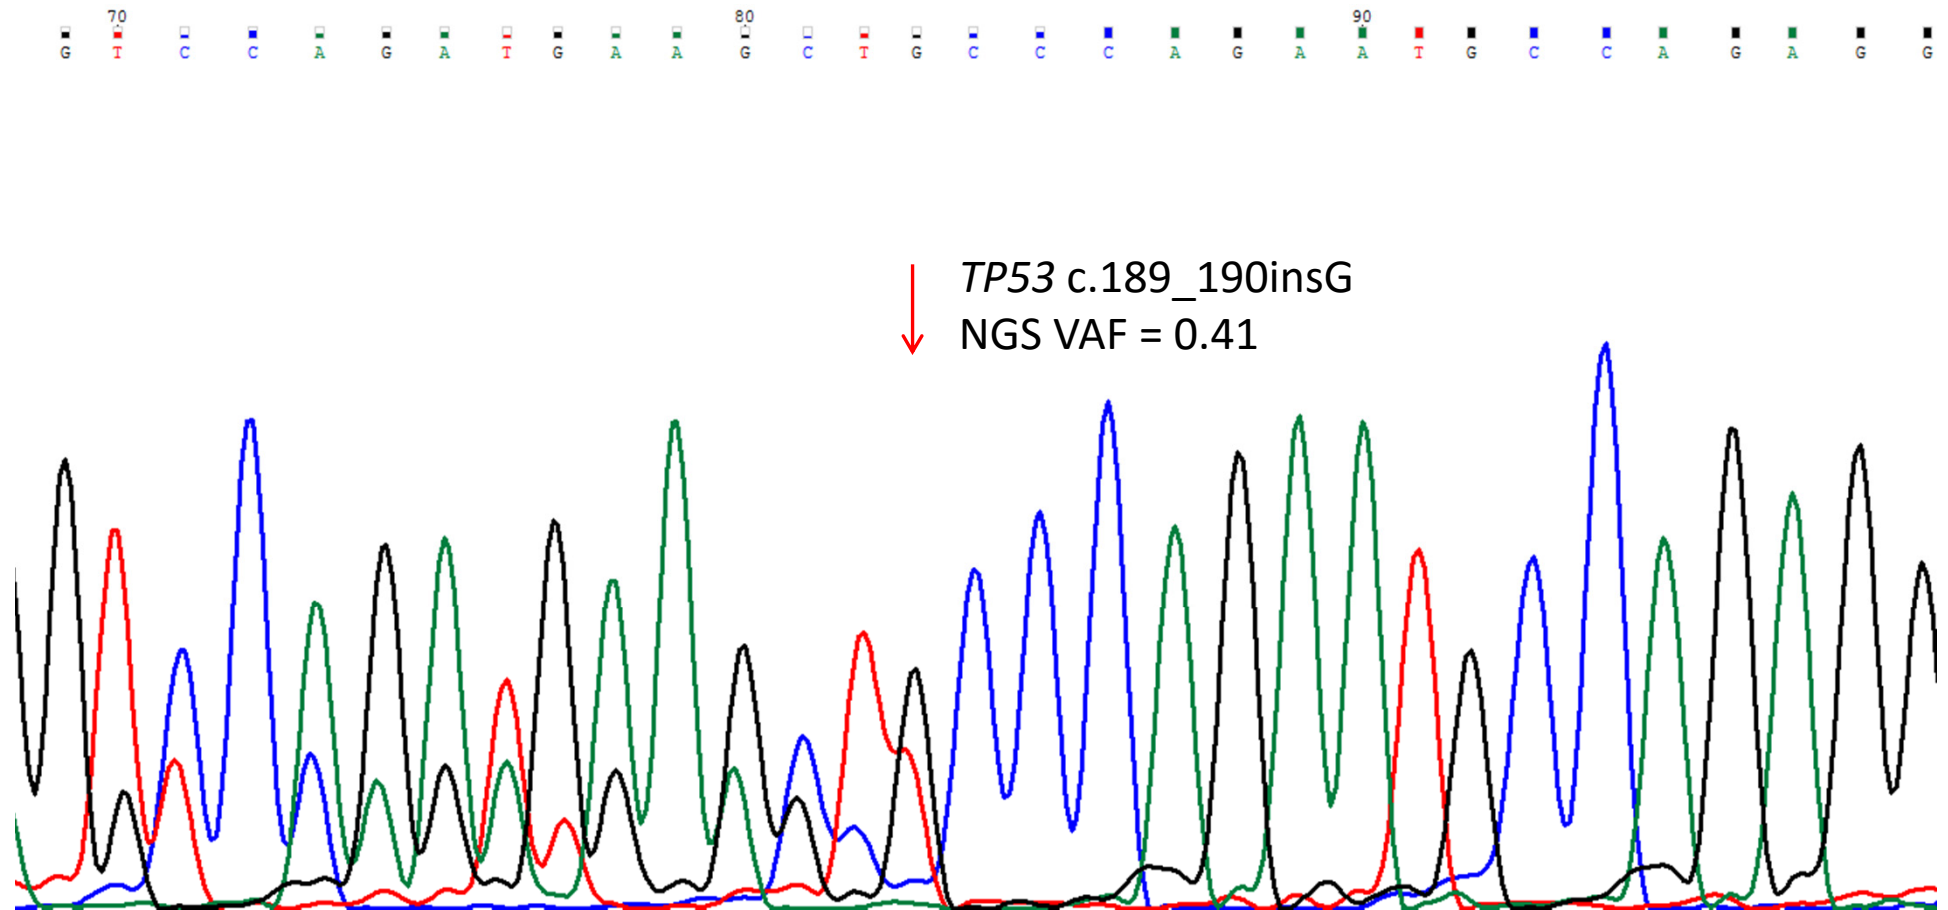

Pt51

*TP53* NM\_000546 c.1024C>T p.R342\*

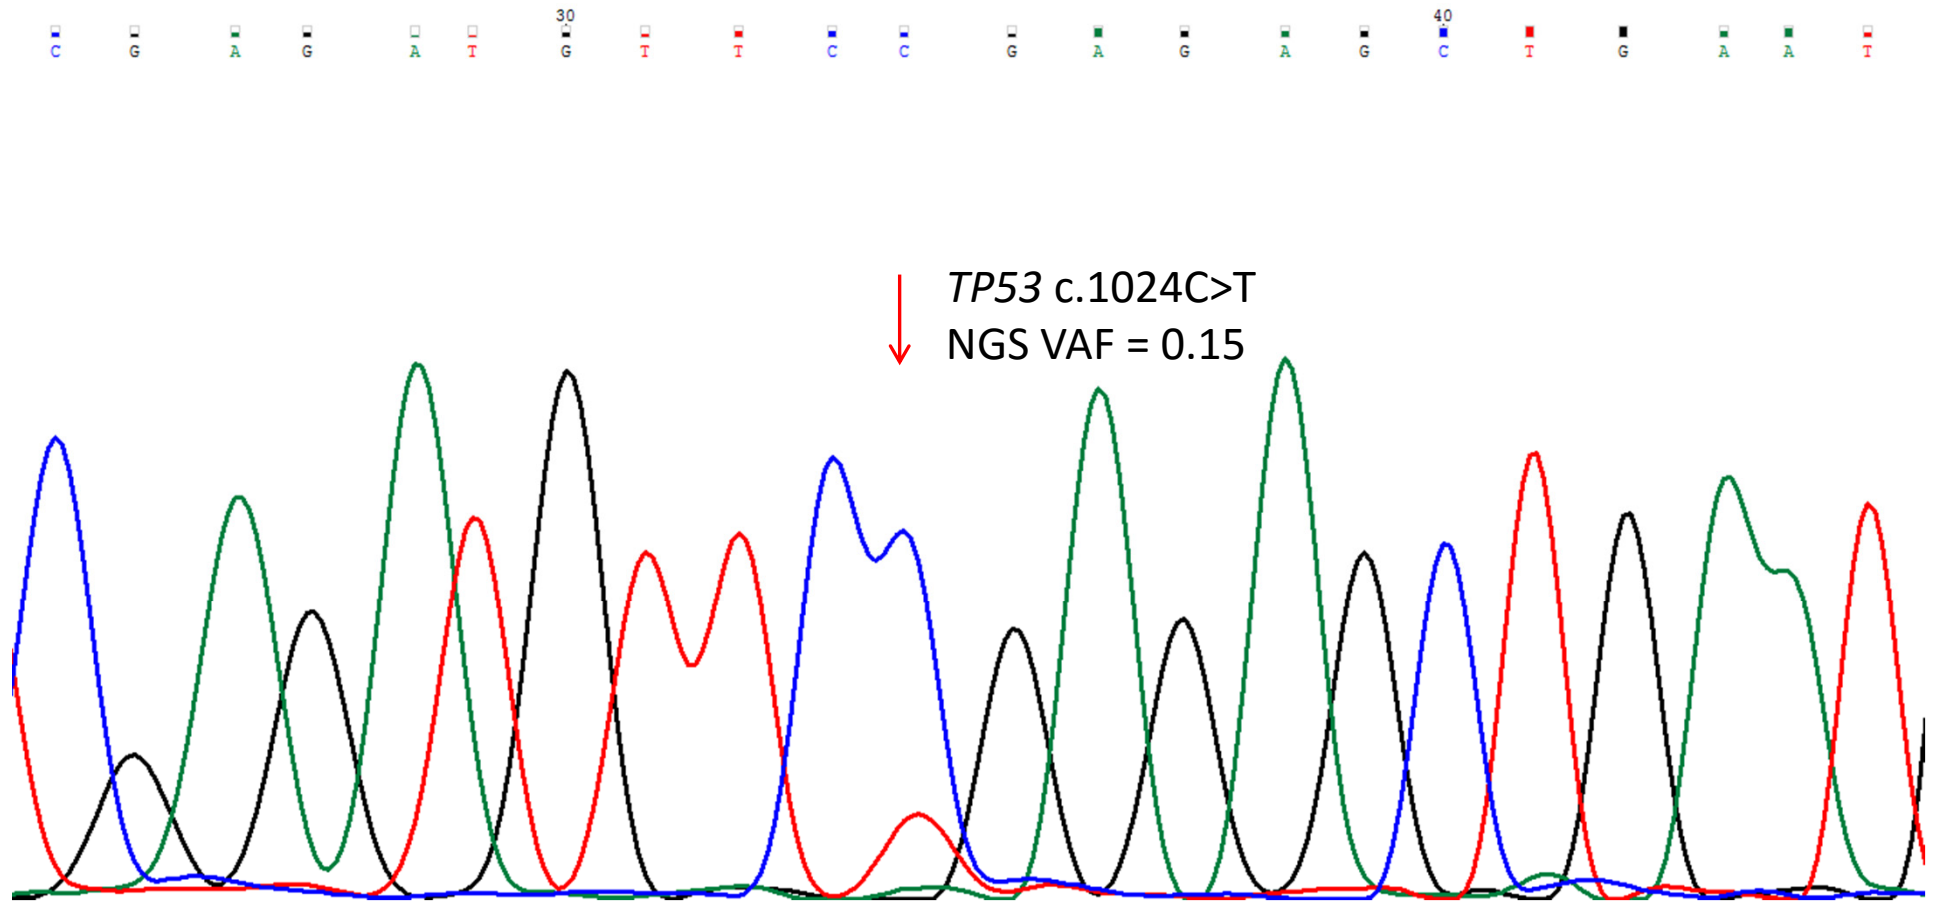

Pt51

NRAS NM\_002524 c.34G>T p.G12C NGS VAF = 0.12

Sanger failed. Validated by ddPCR (VAF = 0.1292)

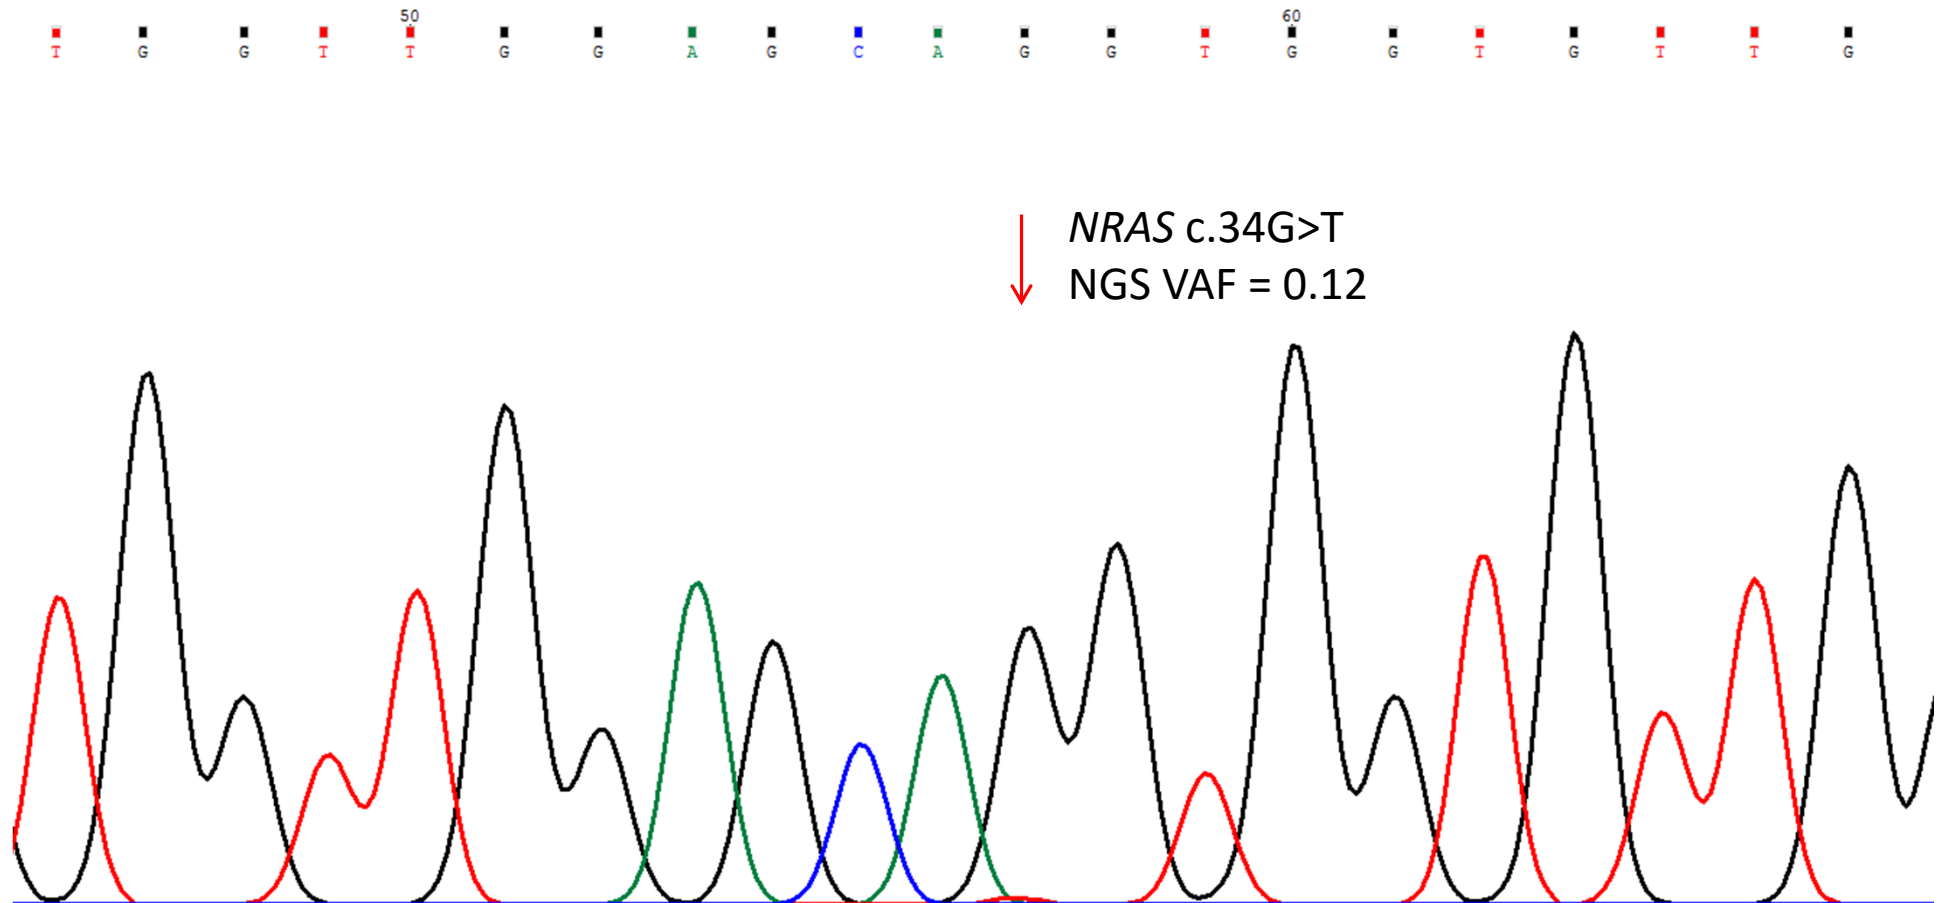



Pt59

*TP53* NM\_000546 c.818G>A p.R273H

A A C A G C T T T G A G G T G C A T G T T T G T G C C T G T C

↓ *TP53* c.818G>A  
NGS VAF = 0.87

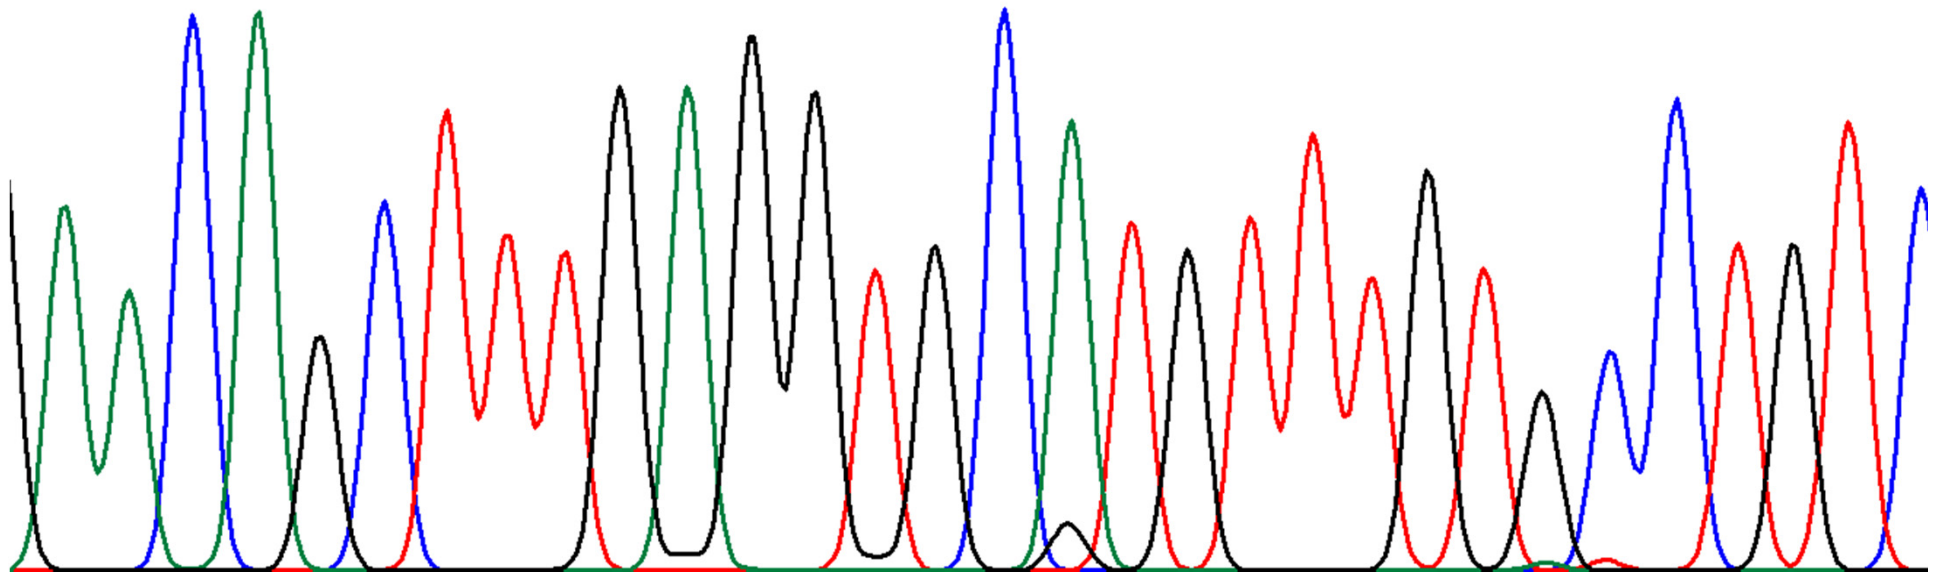

Pt59

*NRAS* NM\_002524 c.181C>A p.Q61K

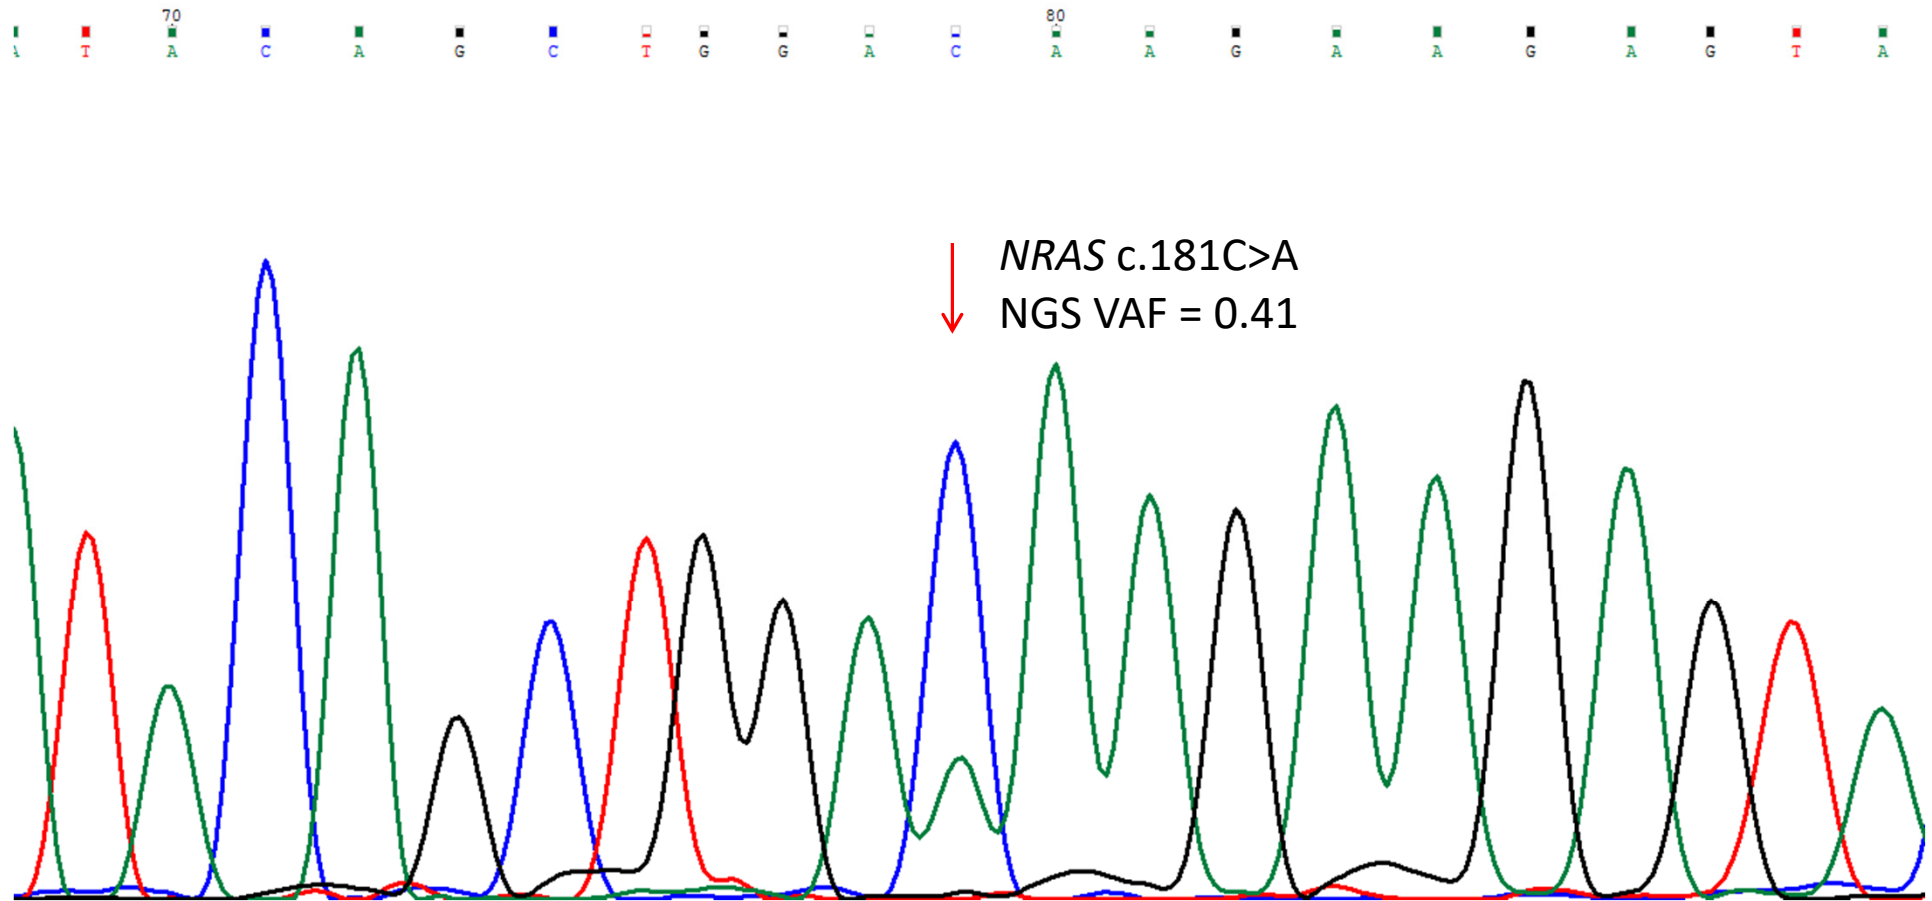

Pt36

*TP53* NM\_000546 c.920-2A>G

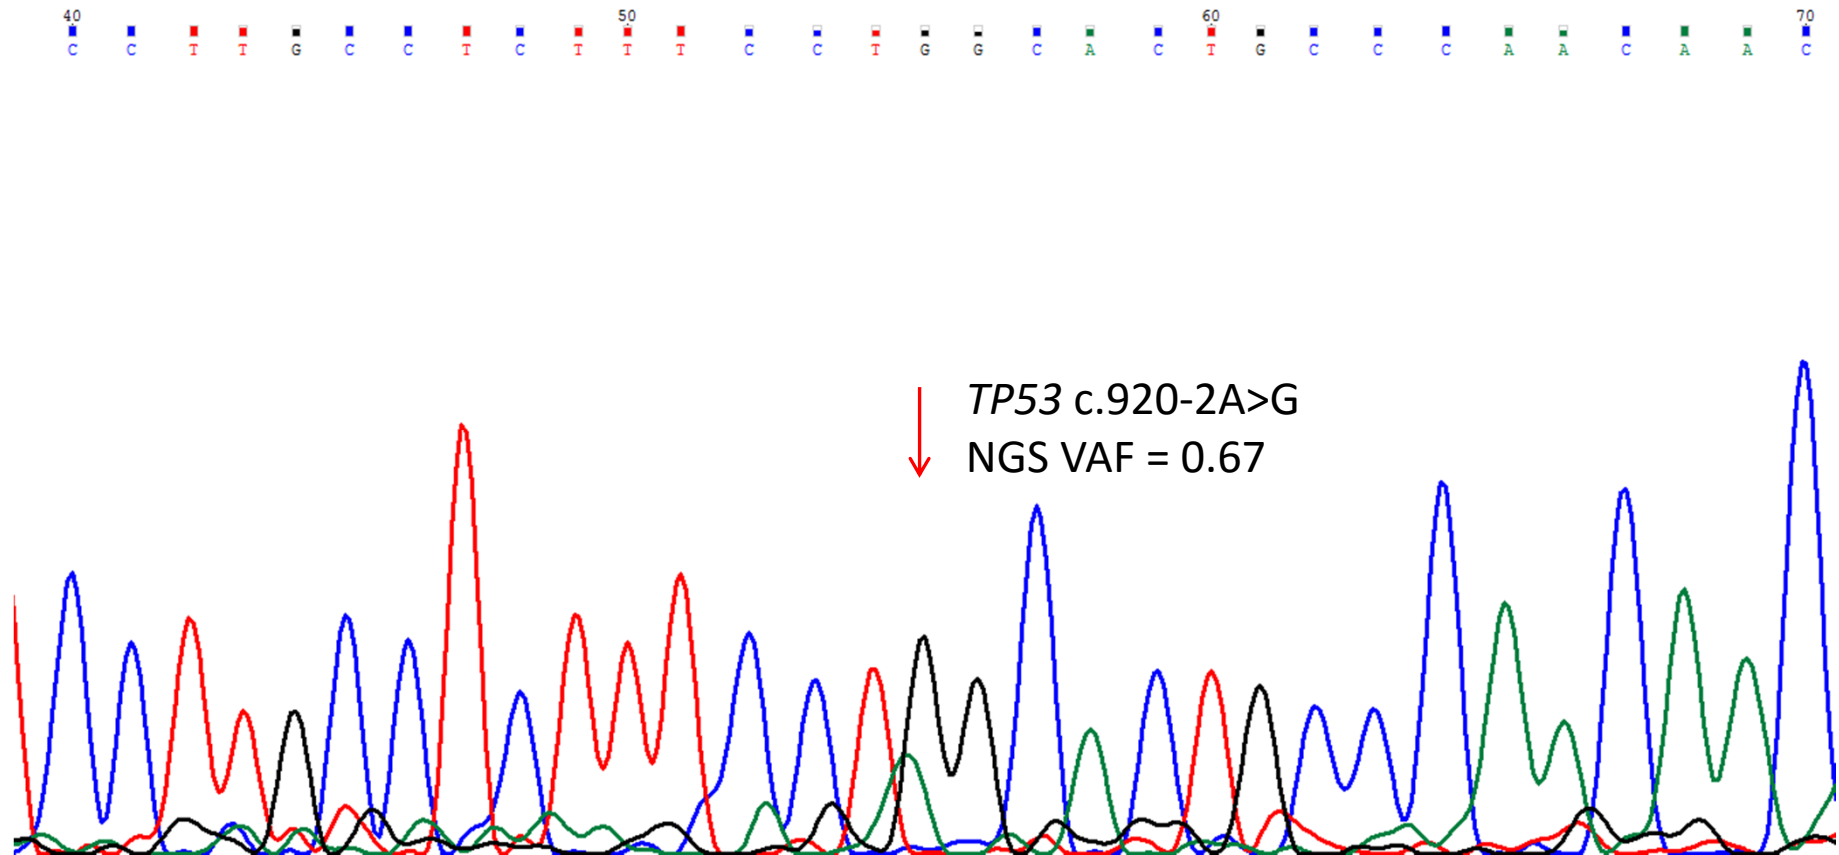

Pt36

*BRAF* NM\_004333 c.1780G>A p.D594N

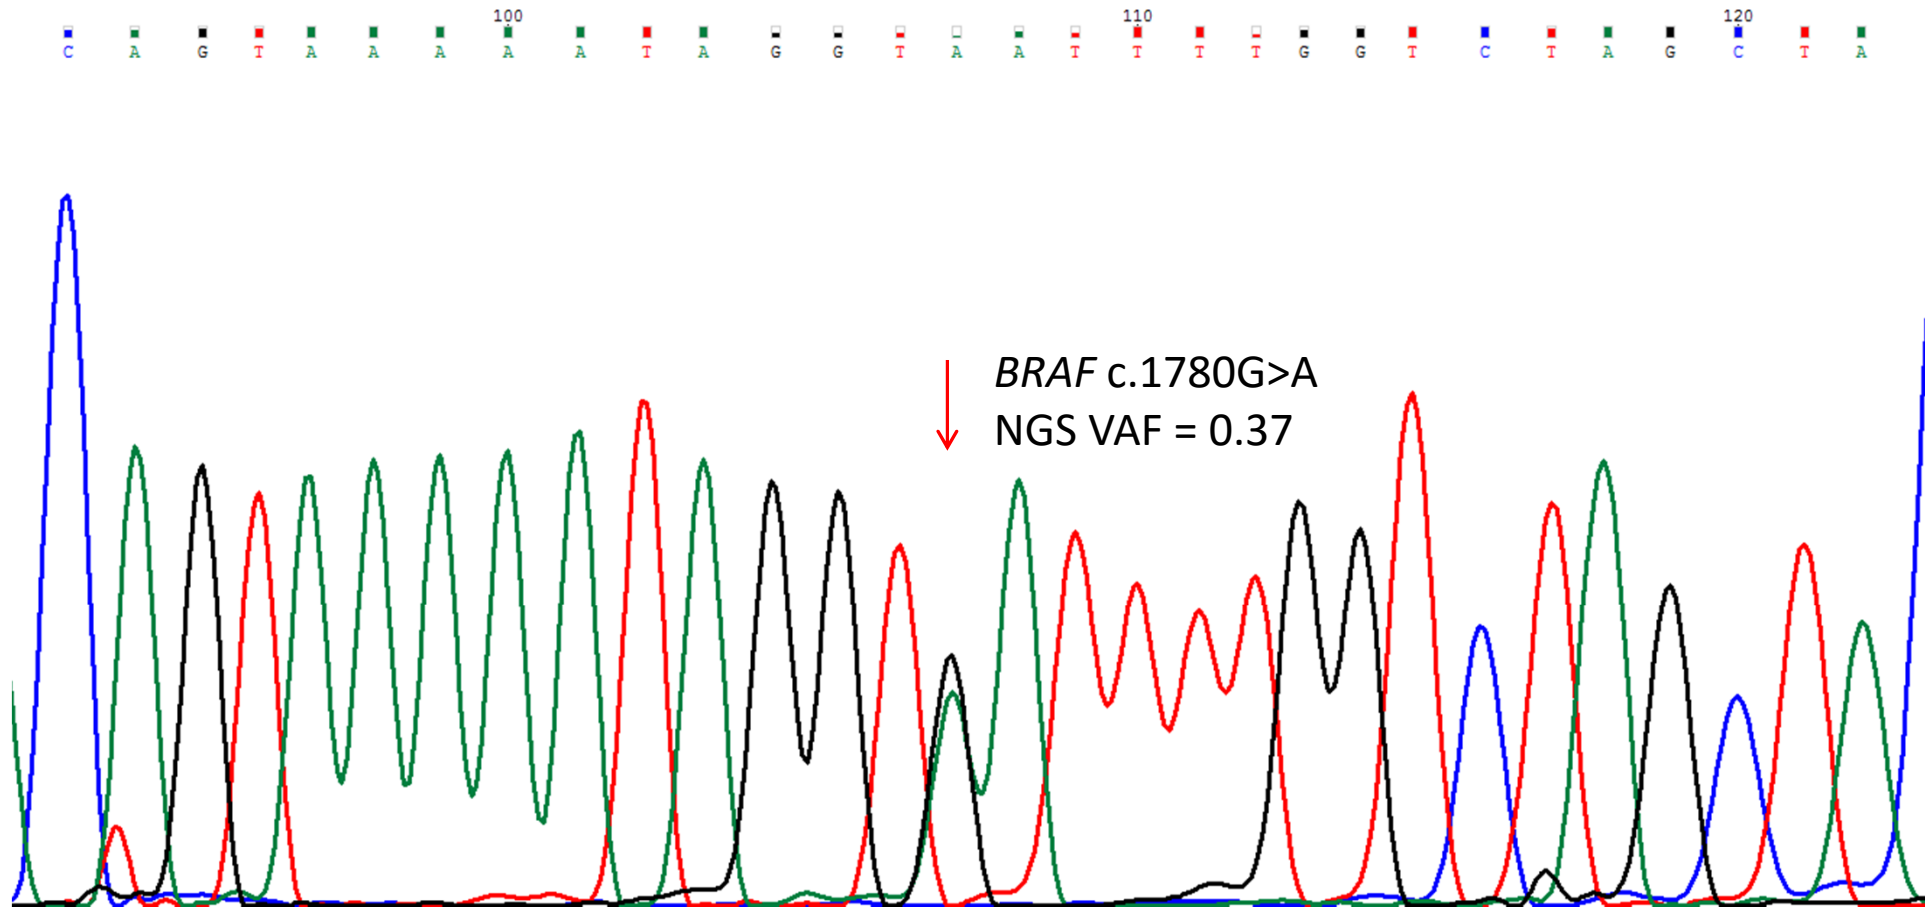

Supplement: CAM4-8-3928-s005.pdf [file CAM4-8-3928-s005.pdf]
