# Supplementary material for: Comprehensive genomic profiling of high‐grade serous ovarian carcinoma from Chinese patients identifies co‐occurring mutations in the Ras/Raf pathway with TP53
Source: PubMed Central journal article supplement (PMC6639185; doi:10.1002/cam4.2243), 2019-05-24
Supplement: CAM4-8-3928-s004.pdf [file CAM4-8-3928-s004.pdf]

Pt13

TP53 NM\_000546 c.742C>T p.R248W

NGS VAF = 0.06 ddPCR VAF = 0.0693

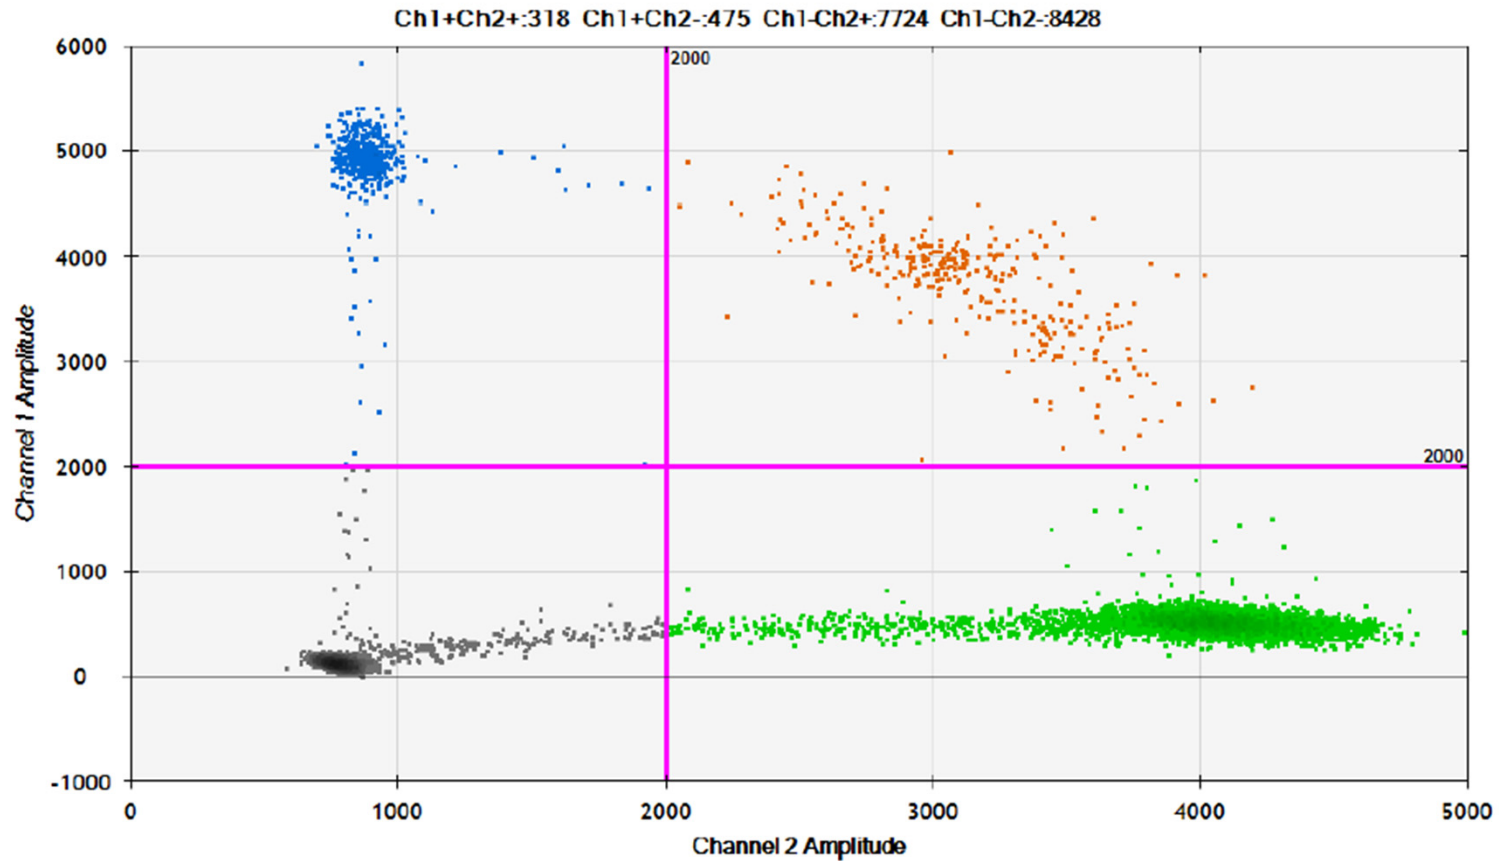

| Accepted Droplets | Concentration (copies/ul) | Copies Per 20uL Well | ddPCR VAF | DNA loaded (ng) |
|-------------------|---------------------------|----------------------|-----------|-----------------|
| 16945             | 56.4                      | 1128                 | 6.93%     | 30.00           |
|                   | 757                       | 15140                |           |                 |

Pt13

*KRAS* NM\_004985 c.35G>A p.G12D

NGS VAF = 0.01 ddPCR VAF = 0.0067

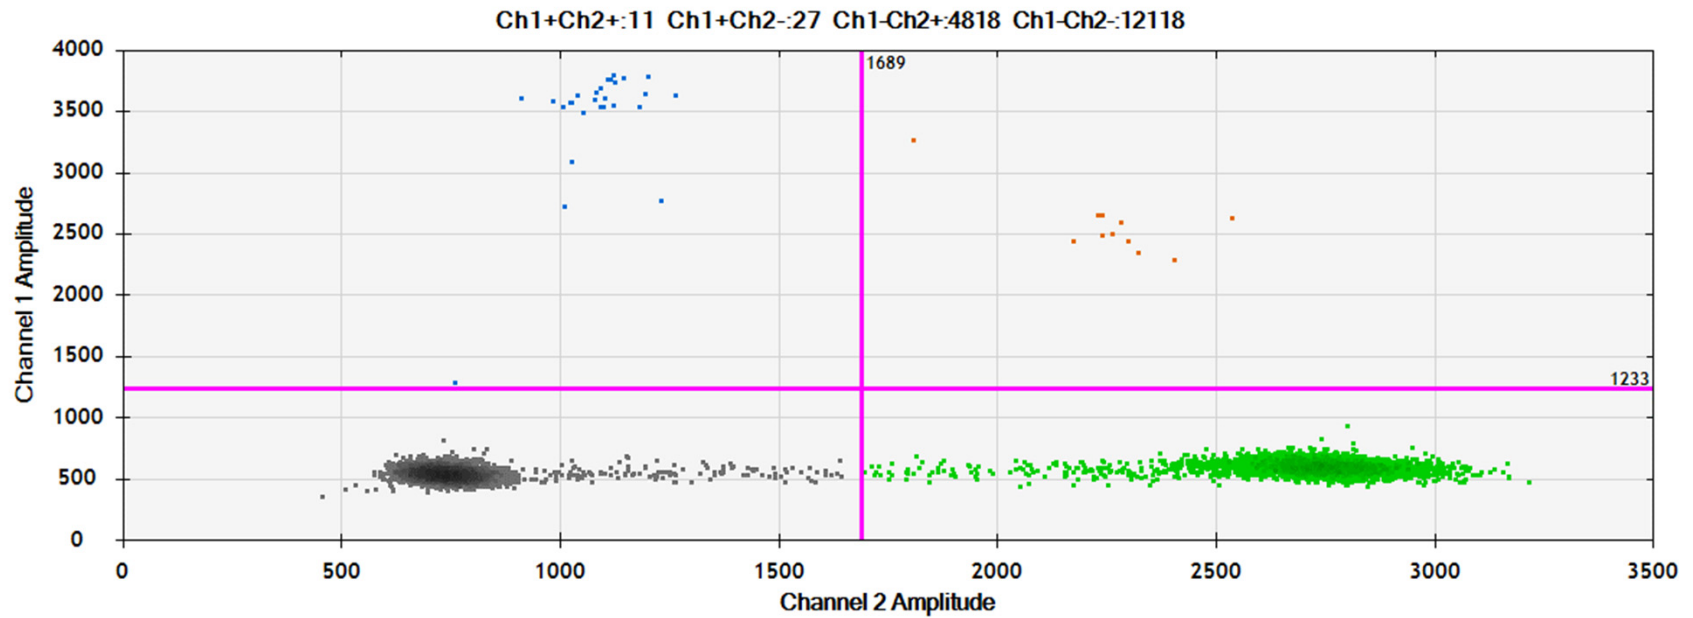

| ddPCR mutant<br>(copies/20ul) | ddPCR wildtype<br>(copies/20ul) | ddPCR<br>percentage of<br>mutant | DNA loaded (ng) |
|-------------------------------|---------------------------------|----------------------------------|-----------------|
| 52                            | 7880                            | 0.67%                            | 8.00            |

Pt51

NRAS NM\_002524 c.34G>T p.G12C  
NGS VAF = 0.12 ddPCR VAF = 0.1292

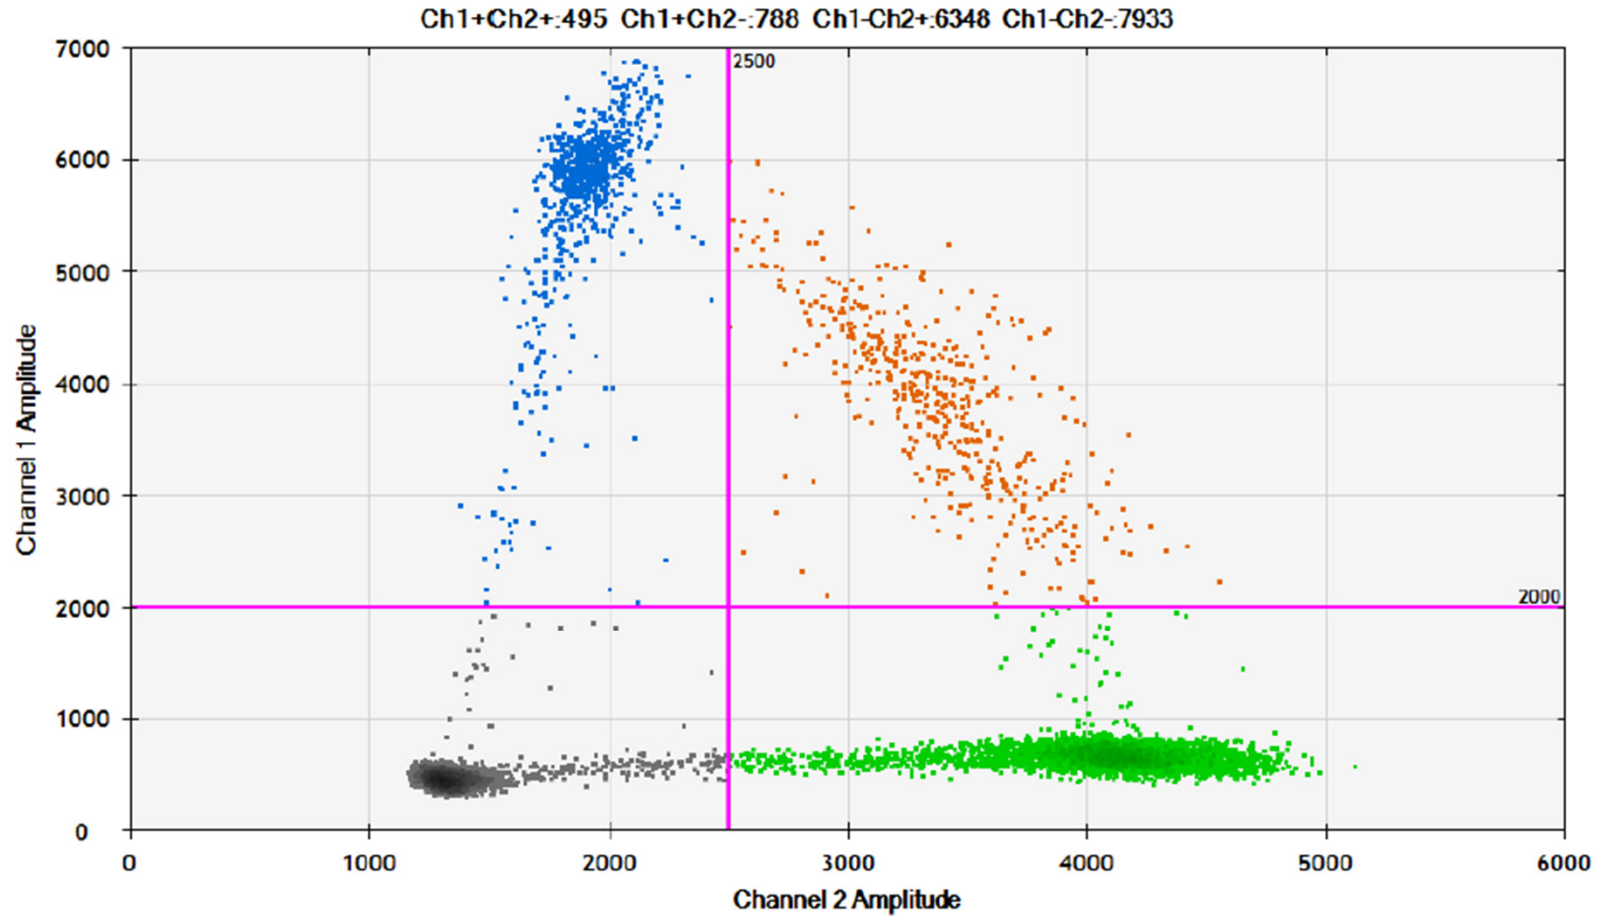

| Accepted Droplets | Concentration (copies/ul) | Copies Per 20uL Well | ddPCR VAF | DNA loaded (ng) |
|-------------------|---------------------------|----------------------|-----------|-----------------|
| 15564             | 101                       | 2020                 | 12.92%    | 30.00           |
|                   | 681                       | 13620                |           |                 |
